# Supplementary material for: Facile one-pot multicomponent synthesis of peptoid based gelators as novel scaffolds for drug incorporation and pH-sensitive release
Source: Royal Society of Chemistry journal article supplement (doi:10.1039/d3tb01527k), 2023-01-01
Supplement: d3tb01527k1.pdf [file d3tb01527k1.pdf]

## Electronic Supplementary Information (ESI)

---

### Facile one-pot multicomponent synthesis of peptoid based gelators as novel scaffolds for drug incorporation and pH-sensitive release

Sharol Sebastian,<sup>a</sup> Eqvinshi Yadav,<sup>a</sup> Priya Bhardwaj,<sup>b</sup> Mulaka Maruthi,<sup>b</sup> Deepak Kumar<sup>c</sup>  
and Manoj K. Gupta<sup>a,\*</sup>

---

<sup>a</sup>Department of Chemistry, School of Basic Sciences, Central University of Haryana, Mahendergarh 123031, Haryana, India. Email – [mkgupta@cuh.ac.in](mailto:mkgupta@cuh.ac.in); Phone: +91 9728739075

<sup>b</sup>Department of Biochemistry, School of Interdisciplinary and Applied Sciences, Central University of Haryana, Mahendergarh 123031, Haryana, India

<sup>c</sup>Department of Pharmaceutical Chemistry, School of Pharmaceutical Sciences, Shoolini University, Solan- 173229, Himachal Pradesh, India

---

| <b>Sl. No.</b> | <b>Contents</b>                                                                                                        | <b>Page No.</b> |
|----------------|------------------------------------------------------------------------------------------------------------------------|-----------------|
| 1.             | <sup>1</sup> H NMR spectrum of compound <b>5a</b>                                                                      | <b>S3</b>       |
| 2.             | <sup>13</sup> C NMR spectrum of compound <b>5a</b>                                                                     | <b>S3</b>       |
| 3.             | <sup>1</sup> H NMR spectrum of compound <b>5b</b>                                                                      | <b>S4</b>       |
| 4.             | <sup>13</sup> C NMR spectrum of compound <b>5b</b>                                                                     | <b>S4</b>       |
| 5.             | <sup>1</sup> H NMR spectrum of compound <b>5c</b>                                                                      | <b>S5</b>       |
| 6.             | <sup>13</sup> C NMR spectrum of compound <b>5c</b>                                                                     | <b>S5</b>       |
| 7.             | <sup>1</sup> H NMR spectrum of compound <b>5d</b>                                                                      | <b>S6</b>       |
| 8.             | <sup>13</sup> C NMR spectrum of compound <b>5d</b>                                                                     | <b>S6</b>       |
| 9.             | <sup>1</sup> H NMR spectrum of compound <b>5e</b>                                                                      | <b>S7</b>       |
| 10.            | <sup>13</sup> C NMR spectrum of compound <b>5e</b>                                                                     | <b>S7</b>       |
| 11.            | <sup>1</sup> H NMR spectrum of compound <b>5f</b>                                                                      | <b>S8</b>       |
| 12.            | <sup>13</sup> C NMR spectrum of compound <b>5f</b>                                                                     | <b>S8</b>       |
| 13.            | <sup>1</sup> H NMR spectrum of compound <b>5g</b>                                                                      | <b>S9</b>       |
| 14.            | <sup>13</sup> C NMR spectrum of compound <b>5g</b>                                                                     | <b>S9</b>       |
| 15.            | <sup>1</sup> H NMR spectrum of compound <b>5h</b>                                                                      | <b>S10</b>      |
| 16.            | <sup>13</sup> C NMR spectrum of compound <b>5h</b>                                                                     | <b>S10</b>      |
| 17.            | <sup>1</sup> H NMR spectrum of compound <b>5i</b>                                                                      | <b>S11</b>      |
| 18.            | <sup>13</sup> C NMR spectrum of compound <b>5i</b>                                                                     | <b>S11</b>      |
| 19.            | UV-Vis spectra for metronidazole (MZ) solutions at different concentrations and the calibration curve                  | <b>S12</b>      |
| 20.            | UV-Vis Spectra of gelator ( <b>5d</b> ), drug metronidazole (MZ), and release of MZ at pH 7.4 from drug loaded gel     | <b>S12</b>      |
| 21.            | UV-Vis Spectra of kinetic degradation of drug composite organo/hydrogel at pH 5.5                                      | <b>S13</b>      |
| 21.            | UV-Vis Spectra of kinetic degradation of drug composite organo/hydrogel at pH 7.4                                      | <b>S13</b>      |
| 22.            | Drug release kinetics plots for drug loaded organo/hydrogels at pH 5.5                                                 | <b>S14</b>      |
| 23.            | Drug release kinetics plots for drug loaded organo/hydrogels at pH 7.4                                                 | <b>S15</b>      |
| 24.            | Cell viability images at different concentrations of <b>5d</b> and <b>5d</b> +MZ                                       | <b>S16</b>      |
| 25.            | The strain amplitude and frequency sweep rheological experiment for <b>5d</b> in DMSO/water at constant frequency 1 Hz | <b>S17</b>      |

---

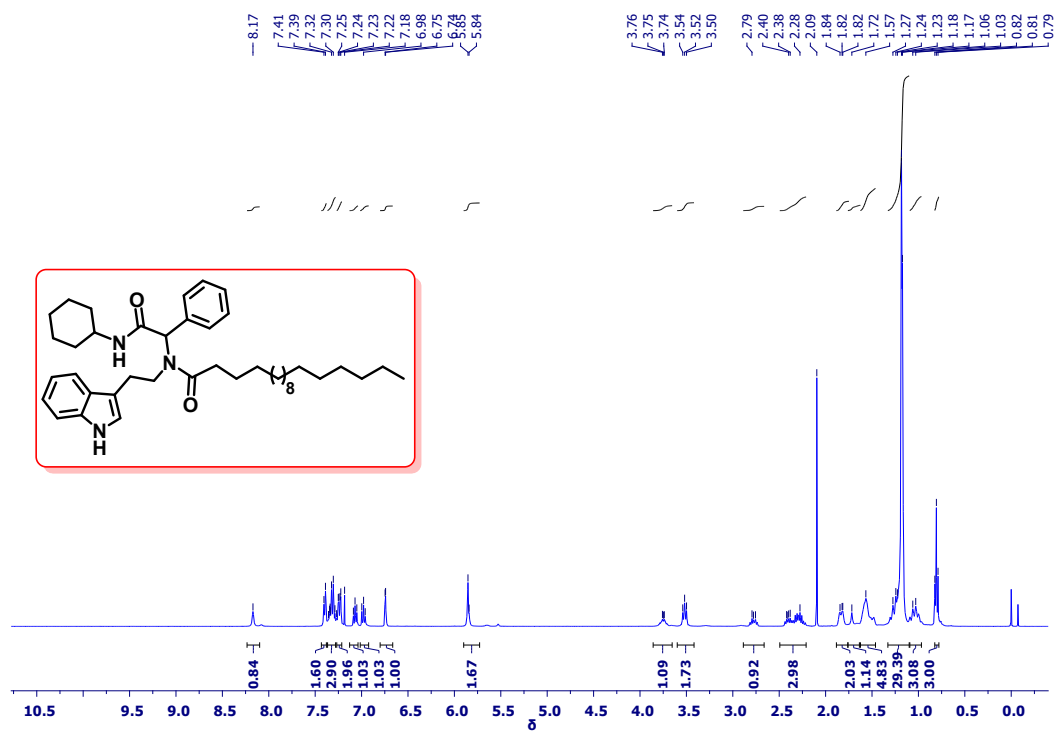

Fig. S1 <sup>1</sup>H NMR spectrum of compound 5a

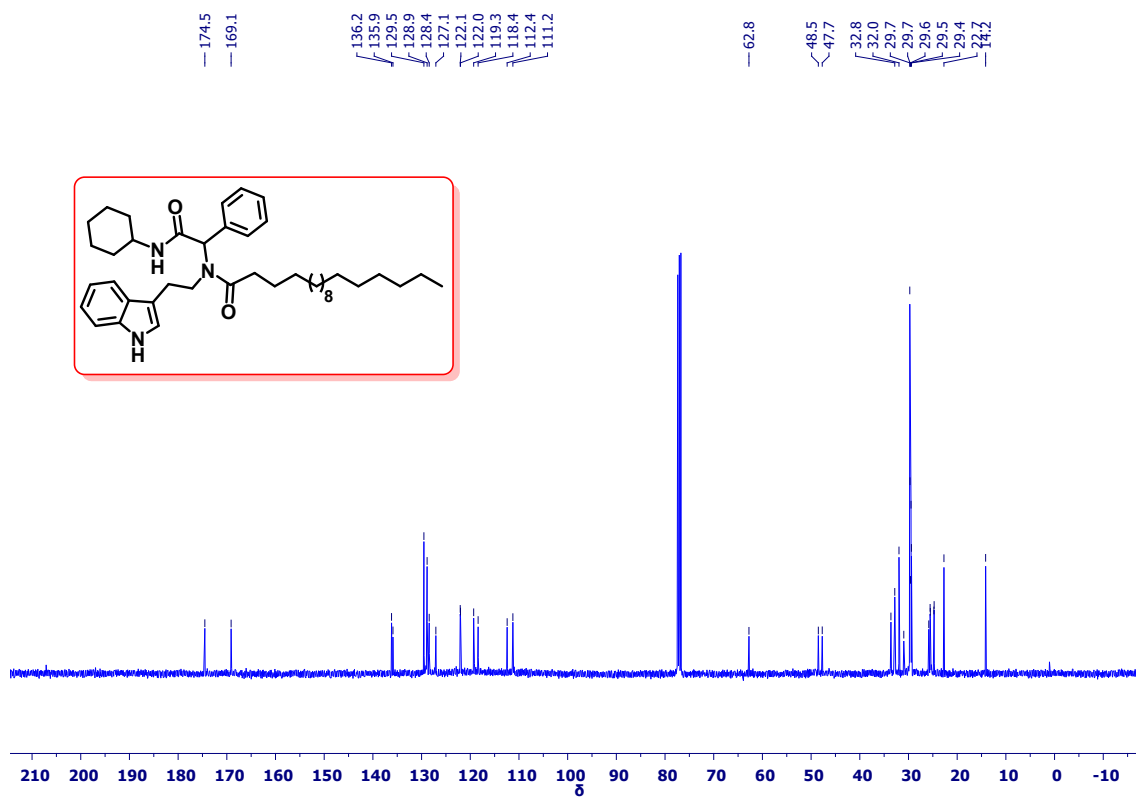

Fig. S2 <sup>13</sup>C NMR spectrum of compound 5a

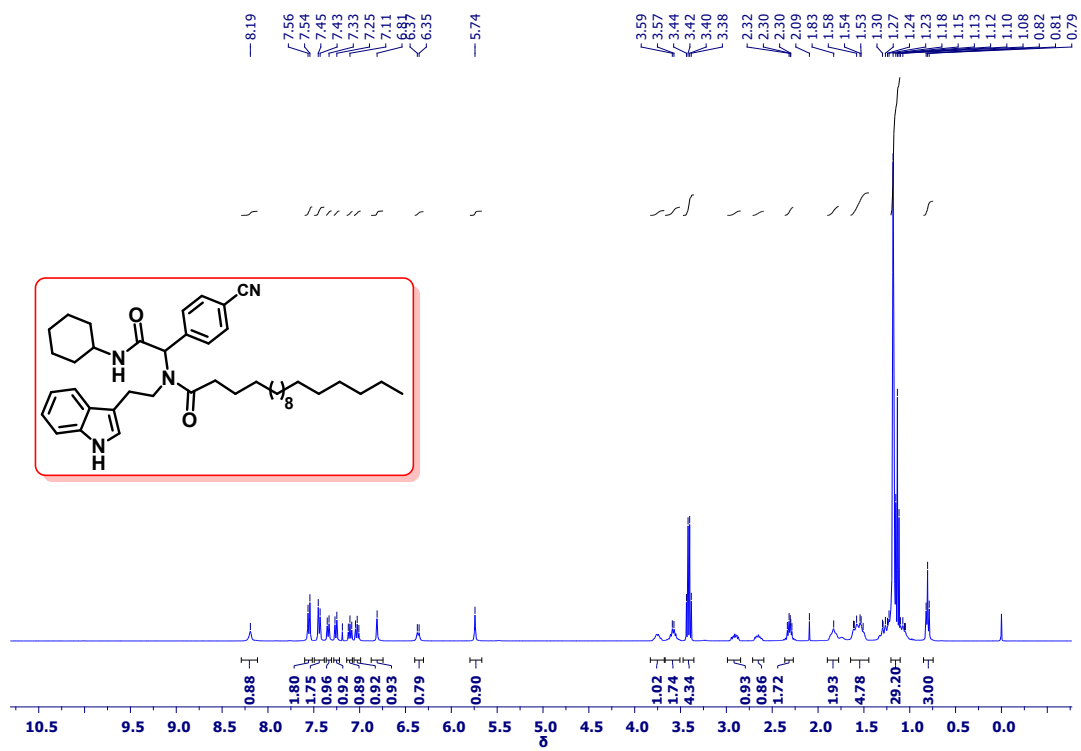

Fig. S3  $^1\text{H}$  NMR spectrum of compound 5b

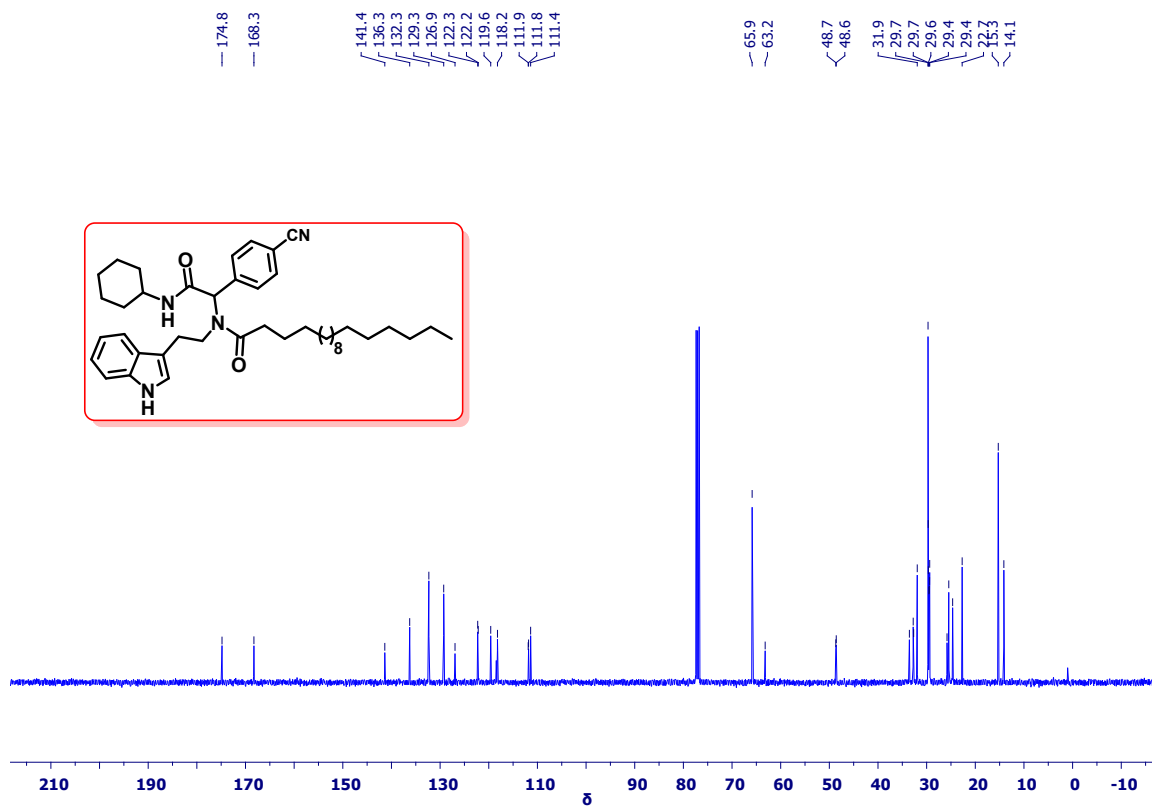

Fig. S4  $^{13}\text{C}$  NMR spectrum of compound 5b

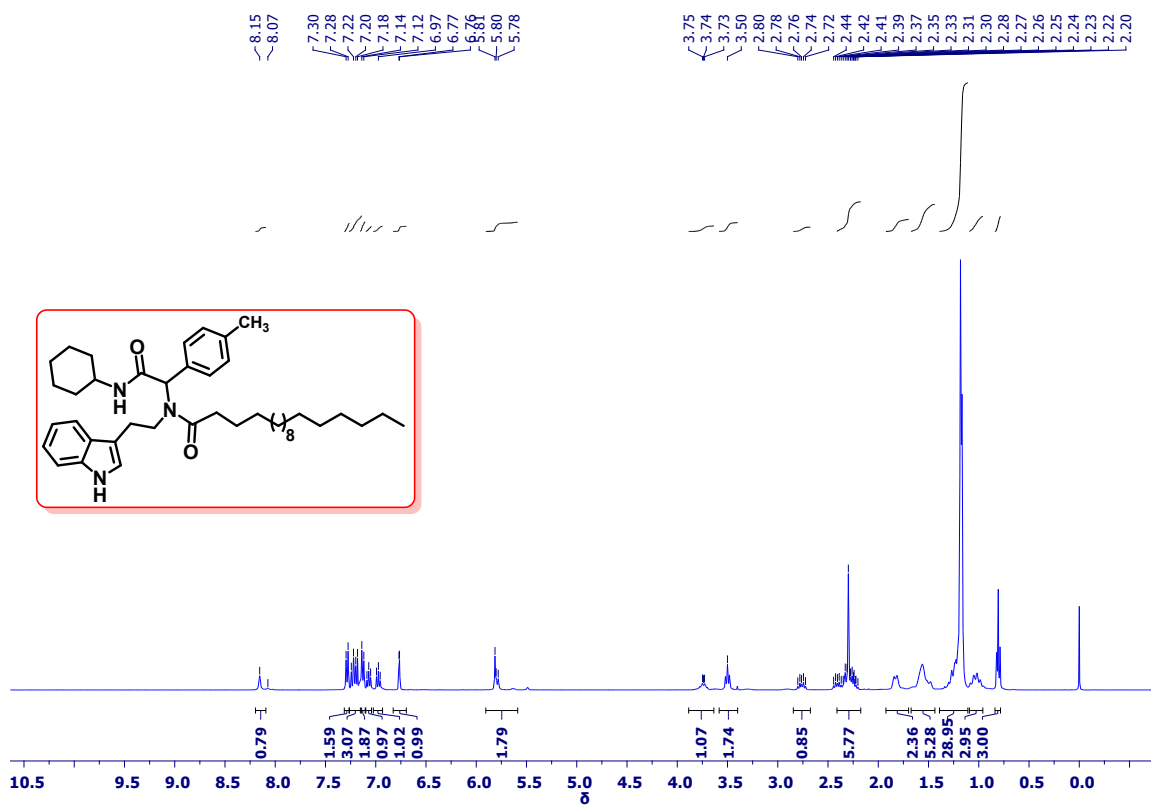

Fig. S5 <sup>1</sup>H NMR spectrum of compound 5c

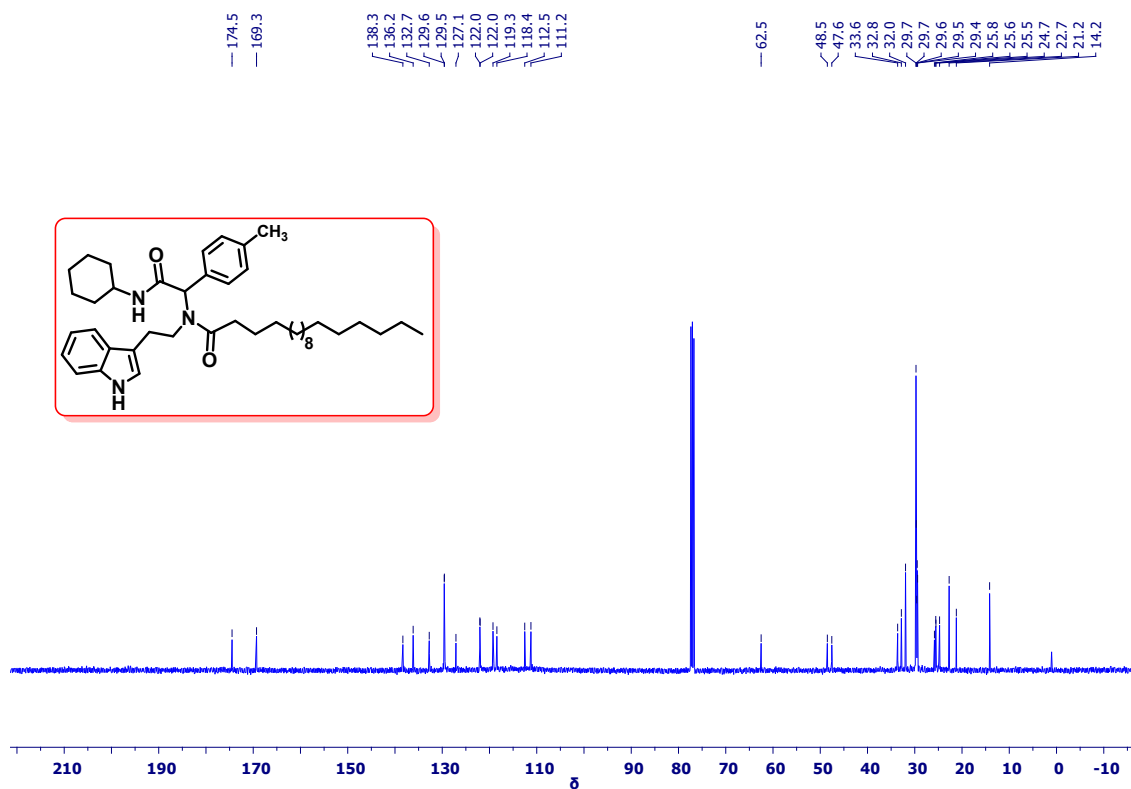

Fig. S6 <sup>13</sup>C NMR spectrum of compound 5c

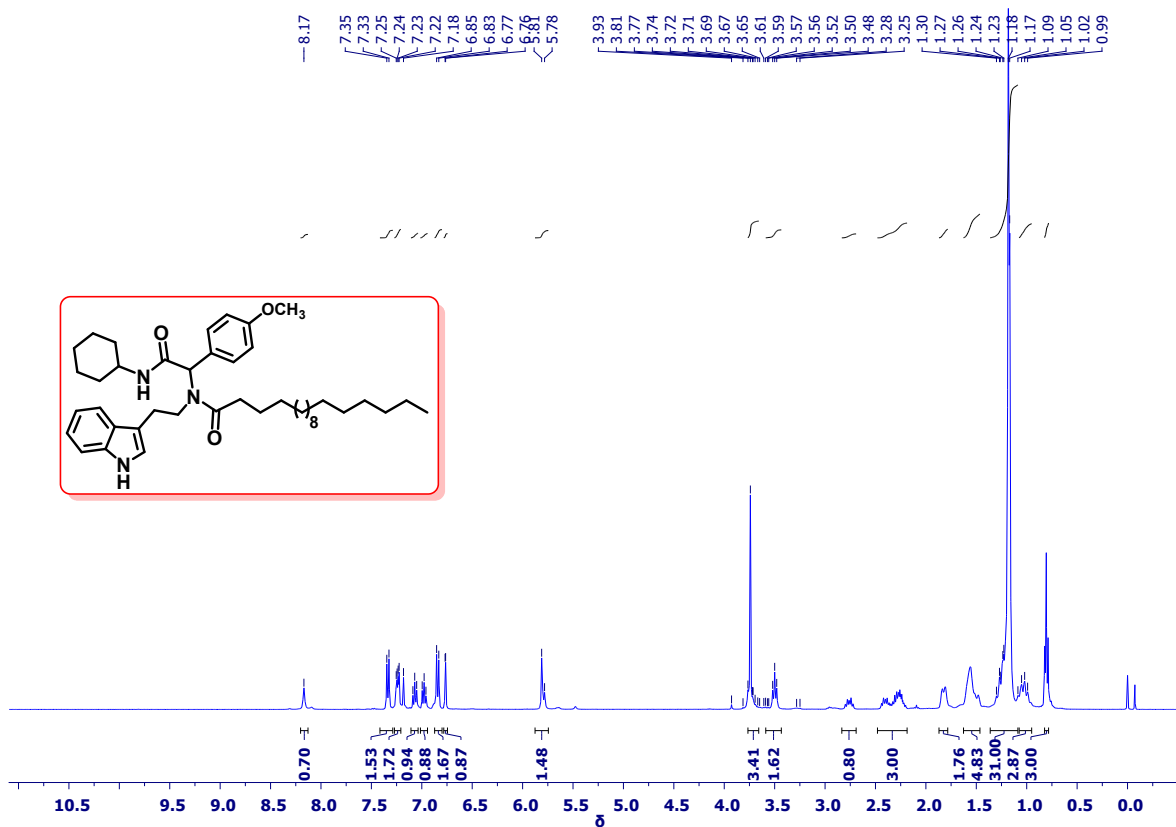

Fig. S7 <sup>1</sup>H NMR spectrum of compound 5d

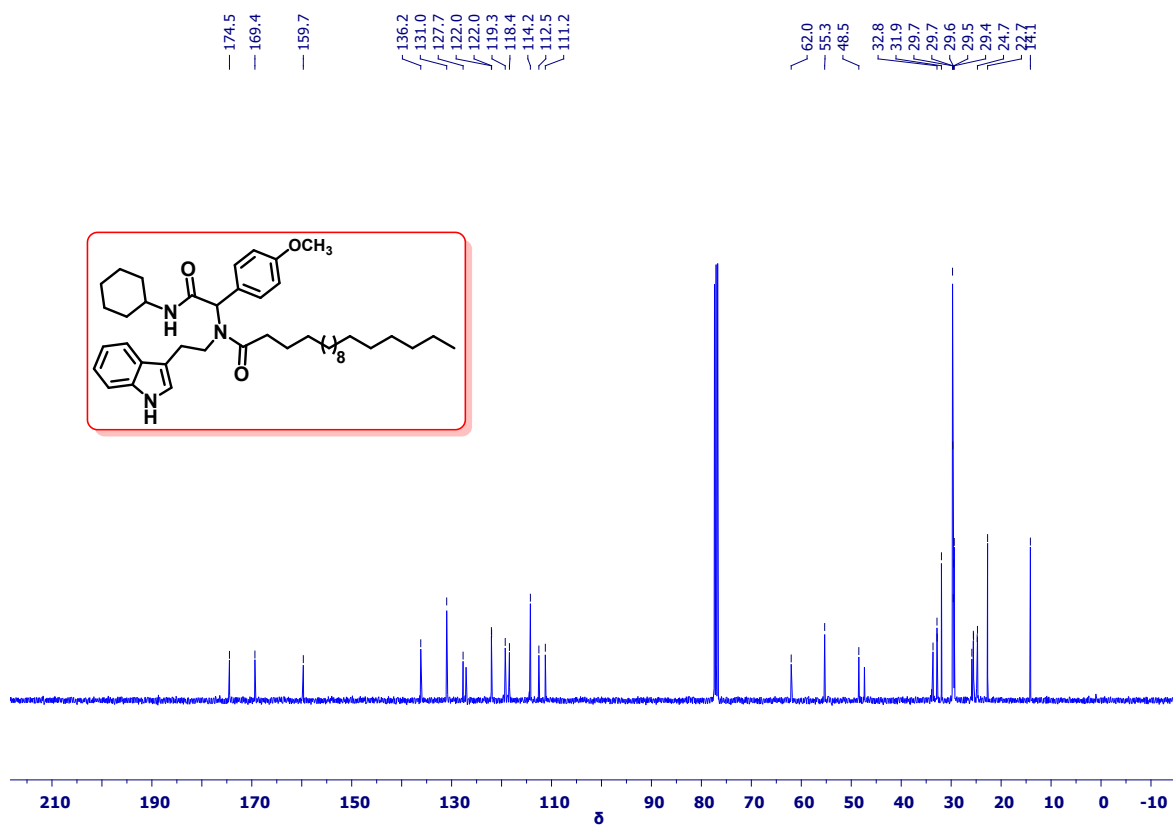

Fig. S8 <sup>13</sup>C NMR spectrum of compound 5d

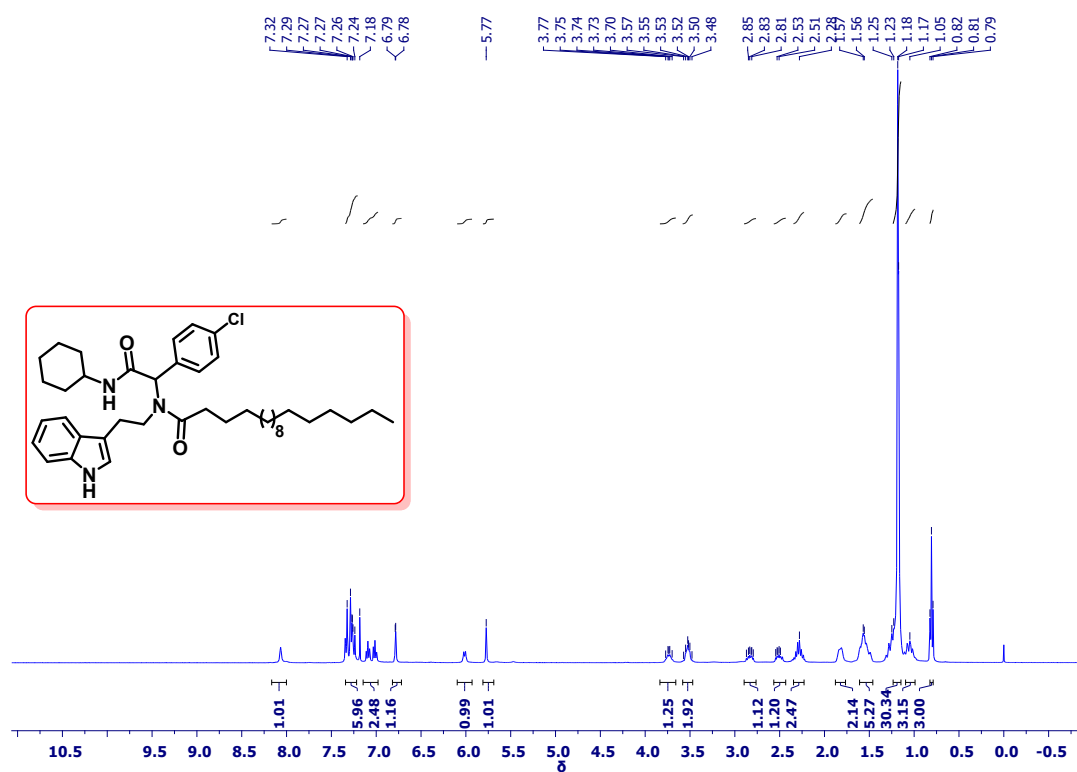

Fig. S9  $^1\text{H}$  NMR spectrum of compound 5e

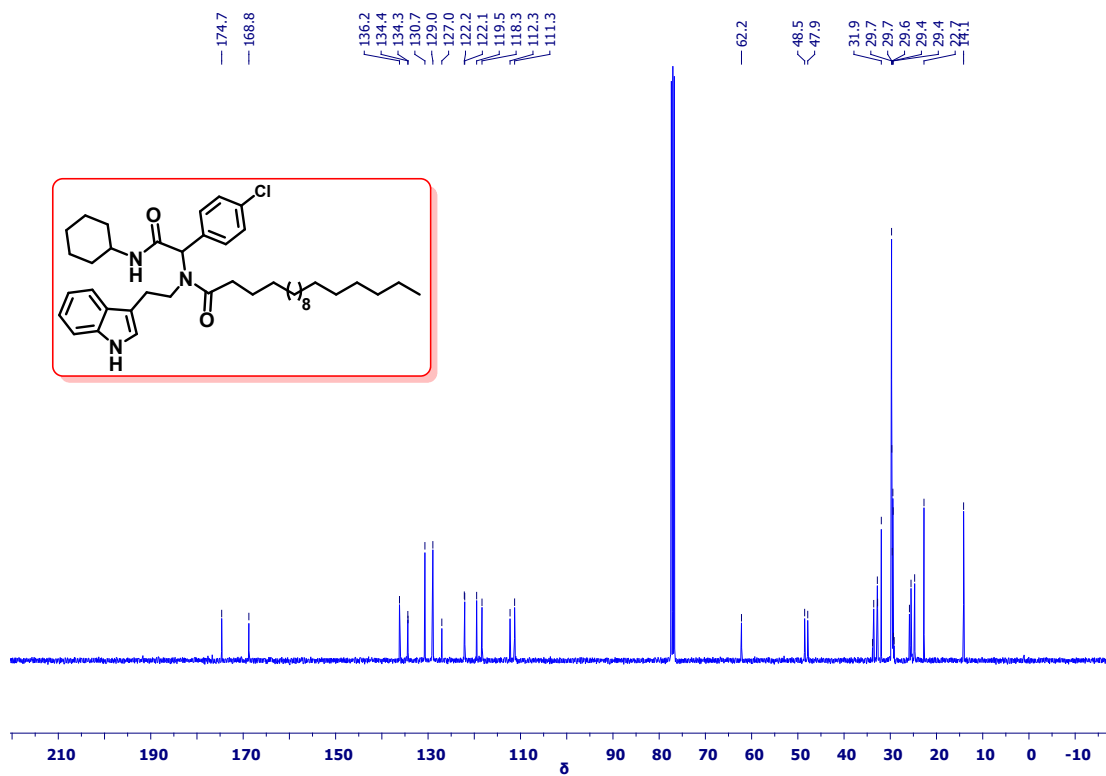

Fig. S10  $^{13}\text{C}$  NMR spectrum of compound 5e

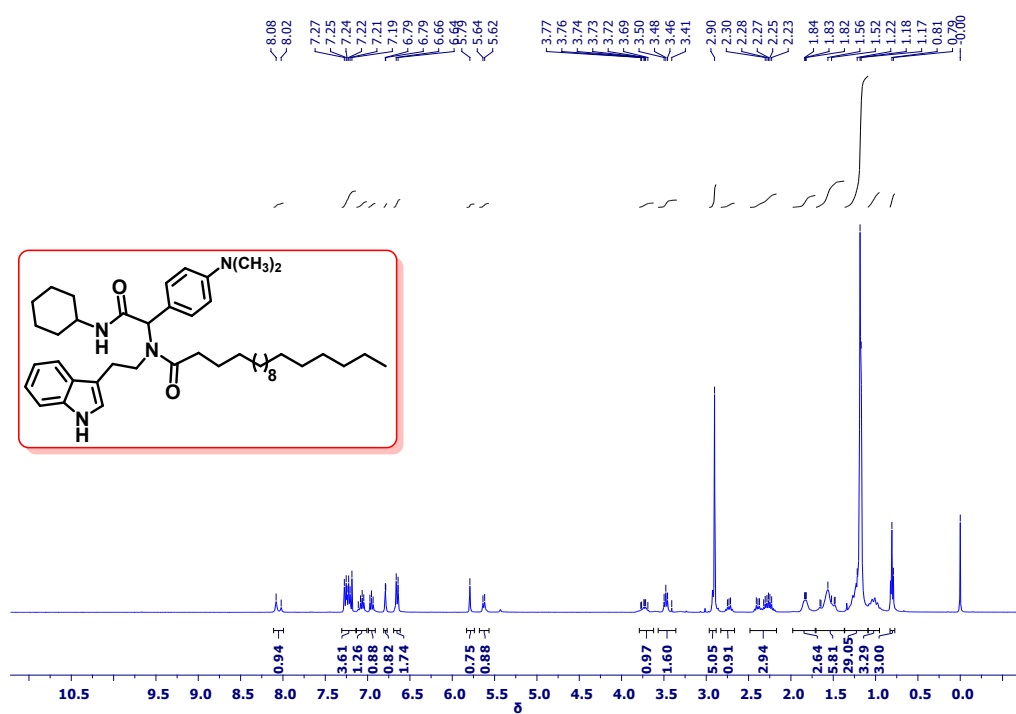

Fig. S11 <sup>1</sup>H NMR spectrum of compound 5f

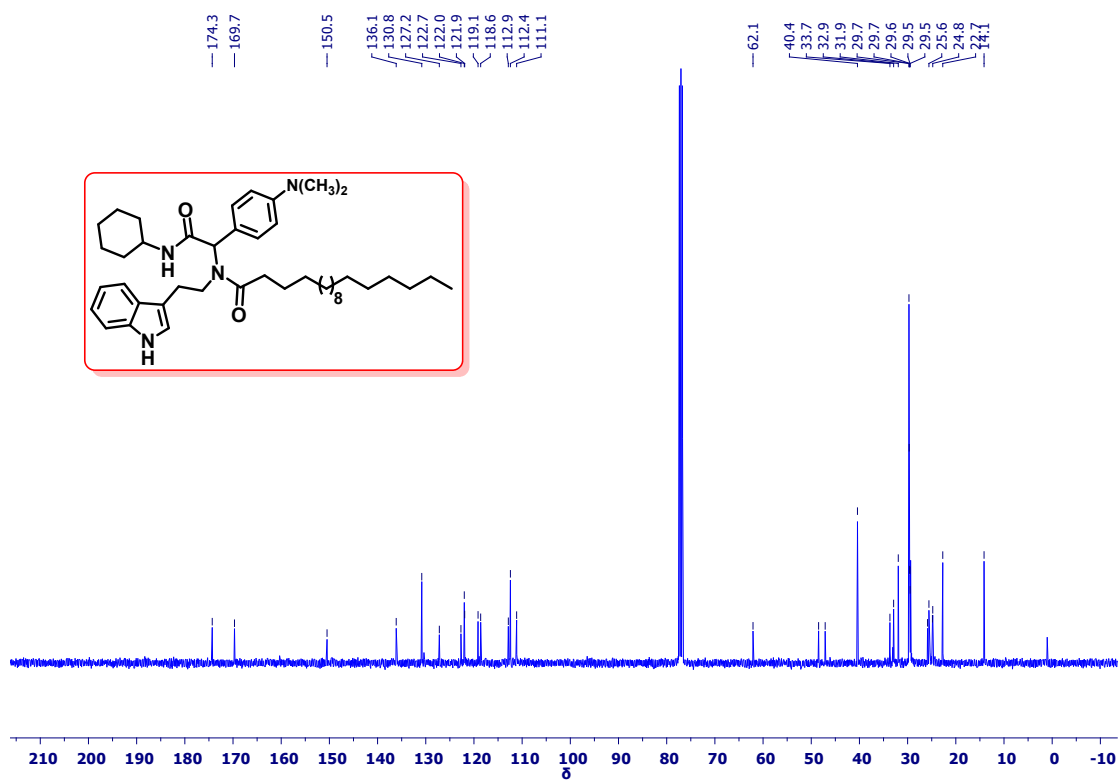

Fig. S12 <sup>13</sup>C NMR spectrum of compound 5f



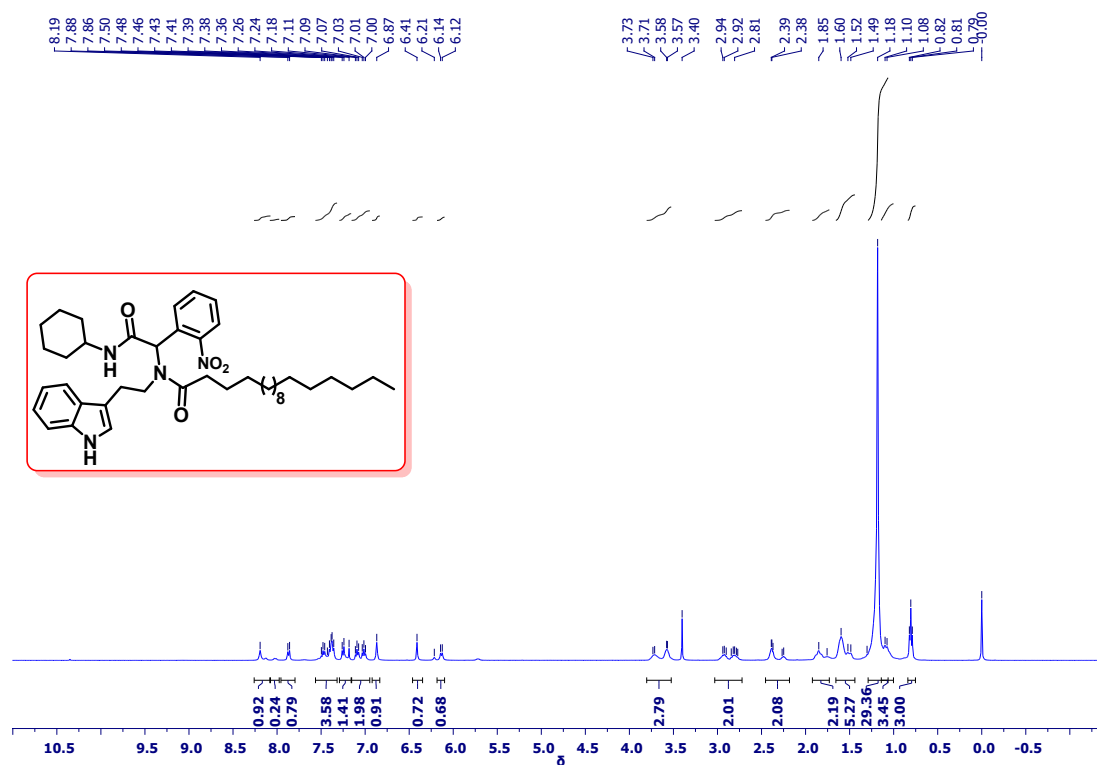

Fig. S13 <sup>1</sup>H NMR spectrum of compound 5g

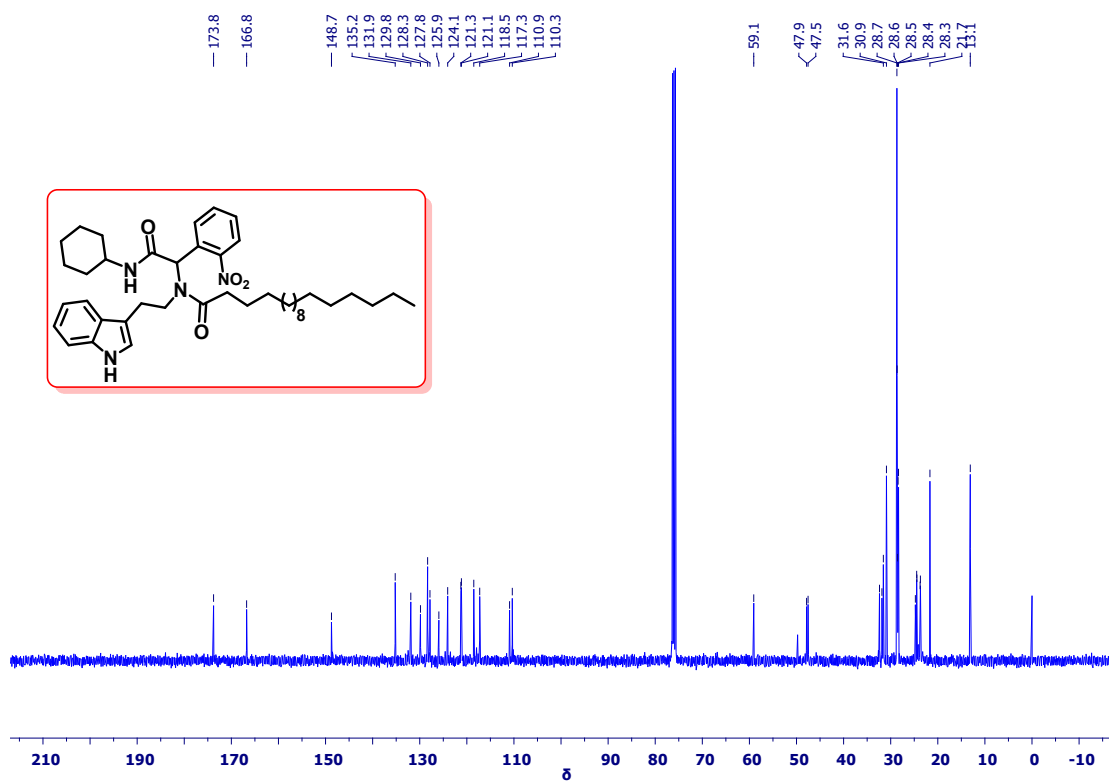

Fig. S14 <sup>13</sup>C NMR spectrum of compound 5g

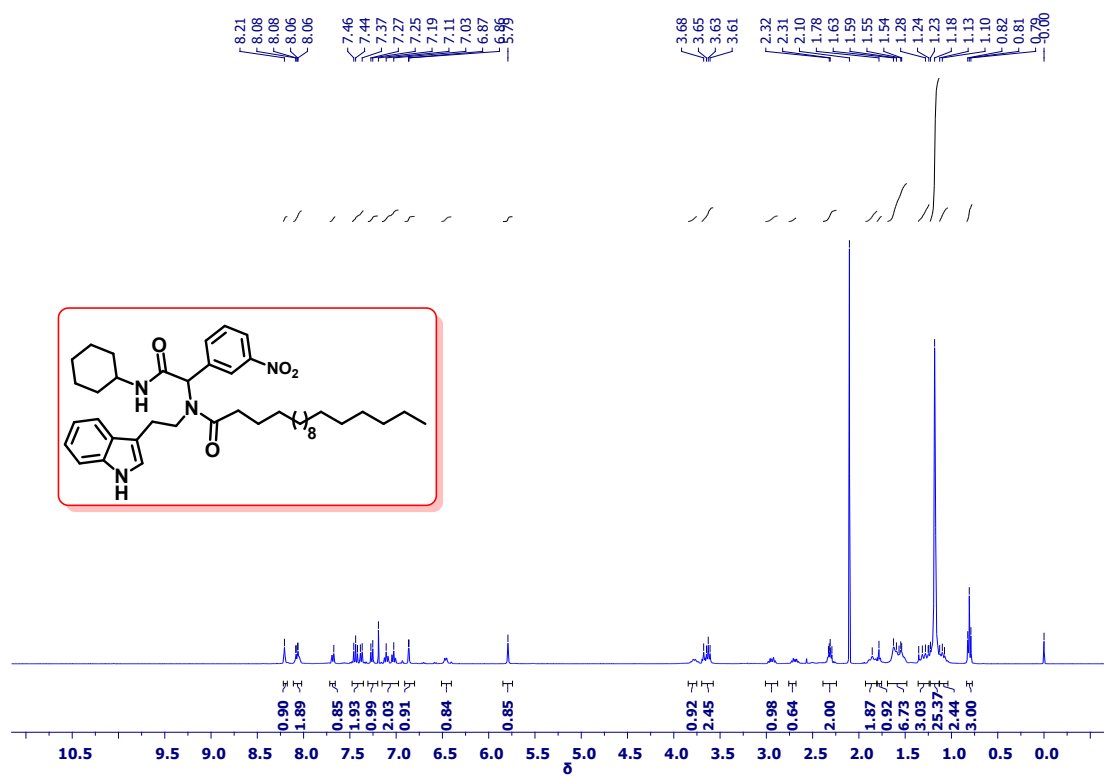

Fig. S15 <sup>1</sup>H NMR spectrum of compound 5h

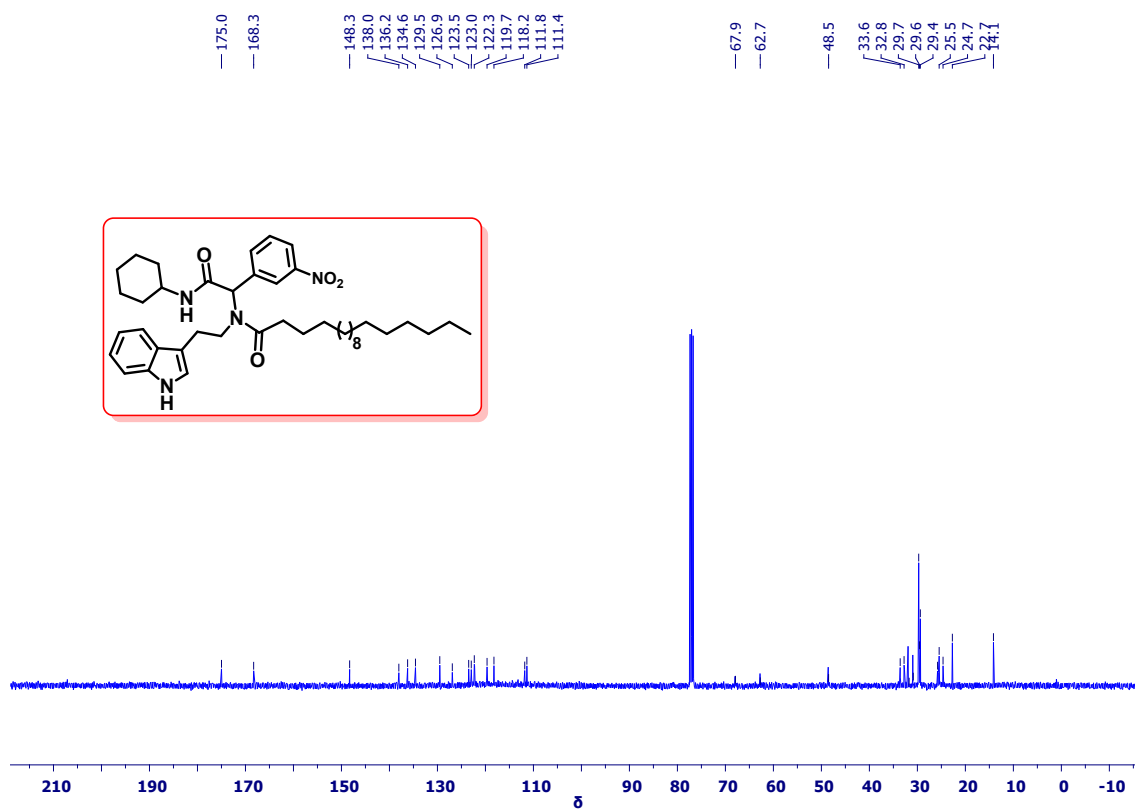

Fig. S16 <sup>13</sup>C NMR spectrum of compound 5h

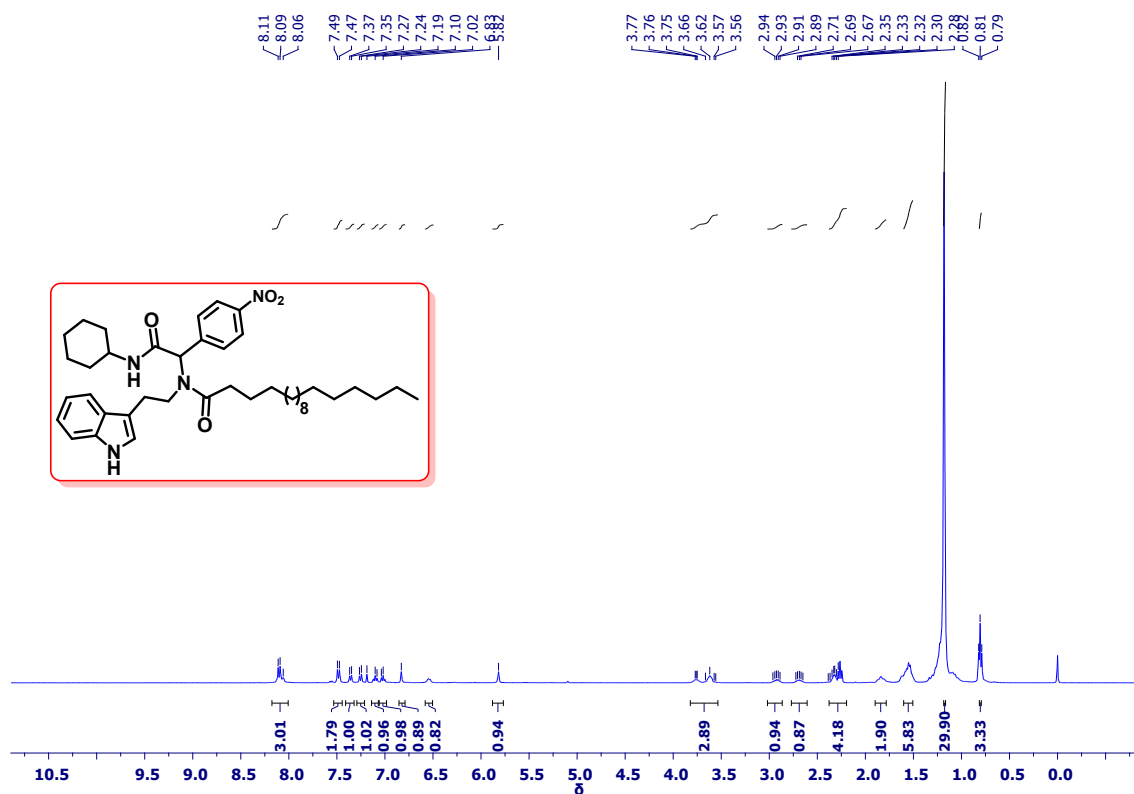

Fig. S17 <sup>1</sup>H NMR spectrum of compound 5i

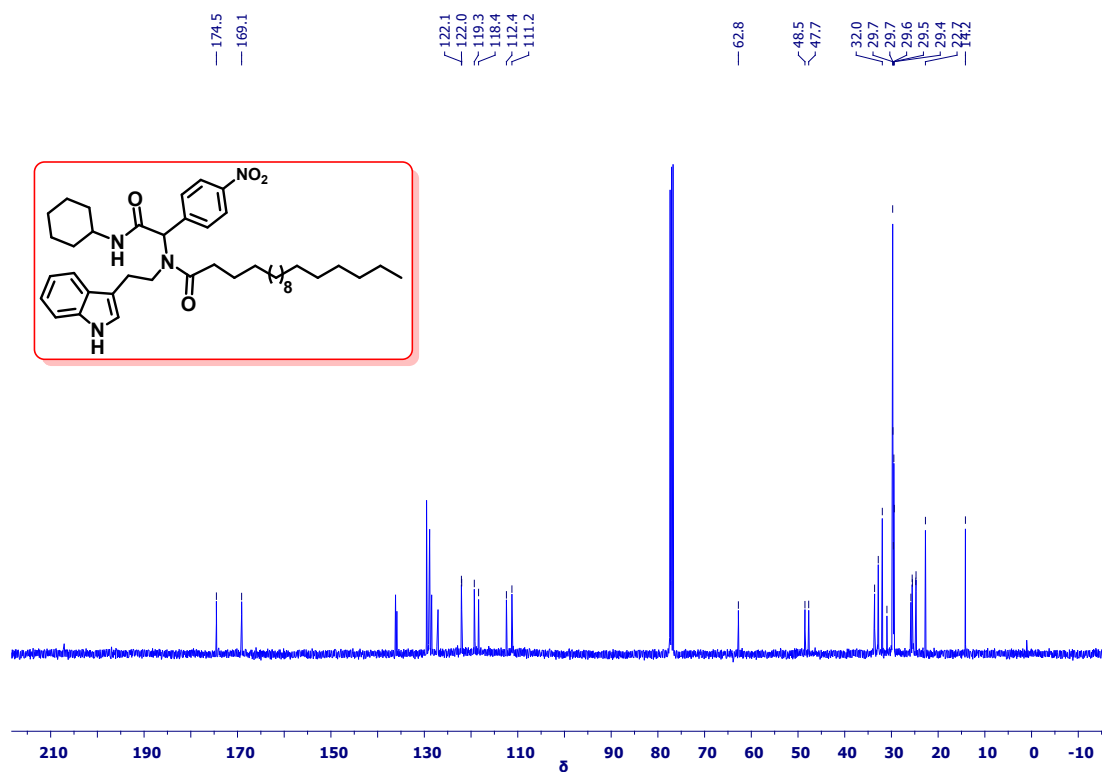

Fig. S18 <sup>13</sup>C NMR spectrum of compound 5i

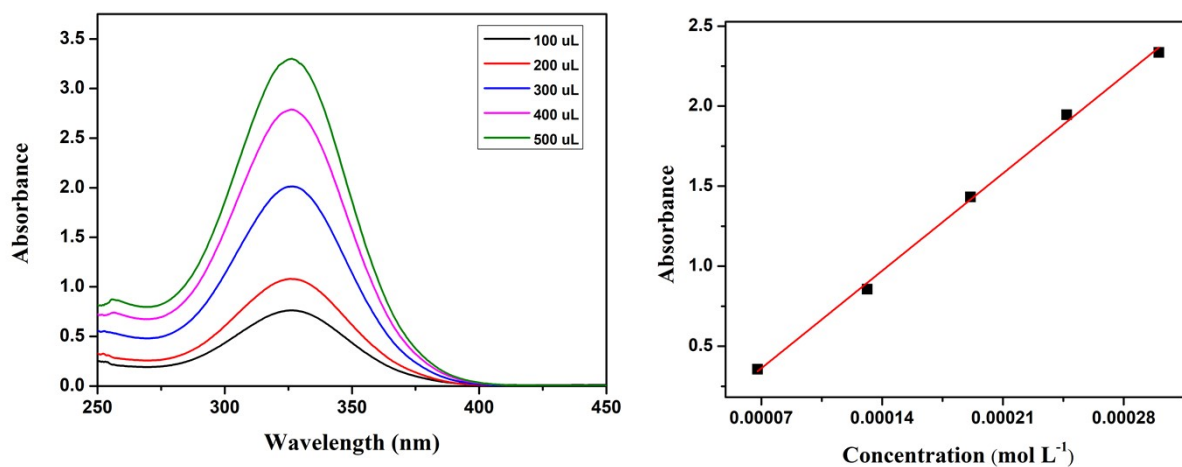

**Fig. S19** UV-Vis spectra collected for Metronidazole (**MZ**) solutions at different concentrations (left), highlighting the **MZ** band at 319 nm used to establish the calibration curve (right) for calculating cumulative drug release

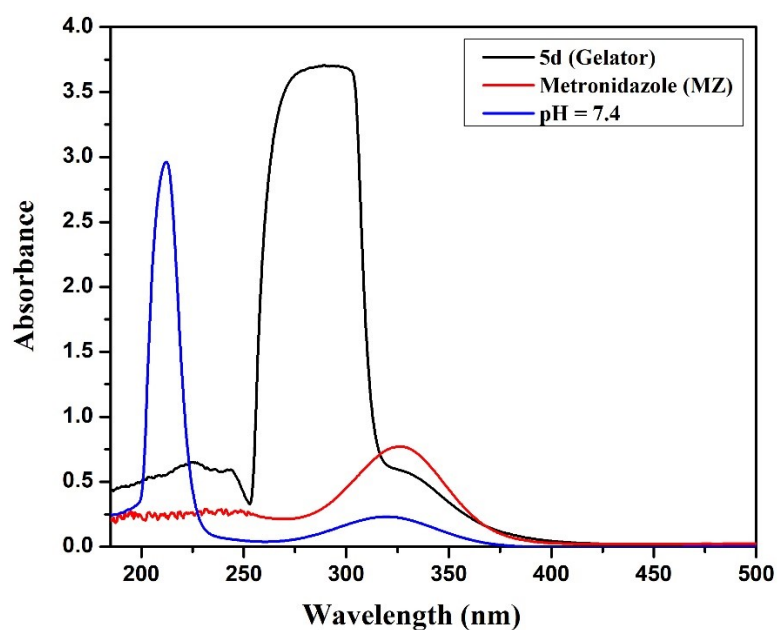

**Fig. S20** UV-Vis spectra of gelator (**5d**), drug metronidazole (**MZ**), and release of **MZ** at pH 7.4 from drug loaded gel

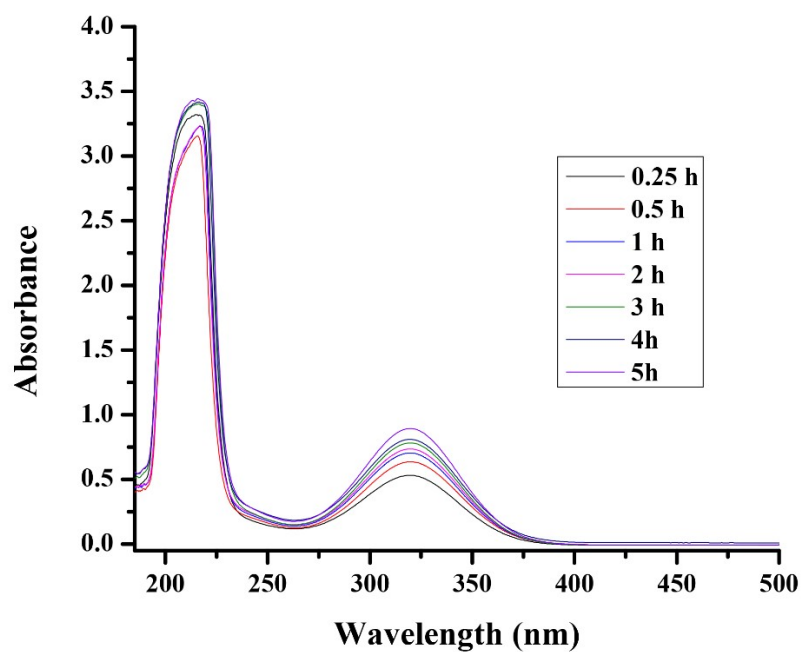

**Fig. S21** UV-Vis spectra of kinetic degradation of drug composite organo/hydrogel at pH 5.5

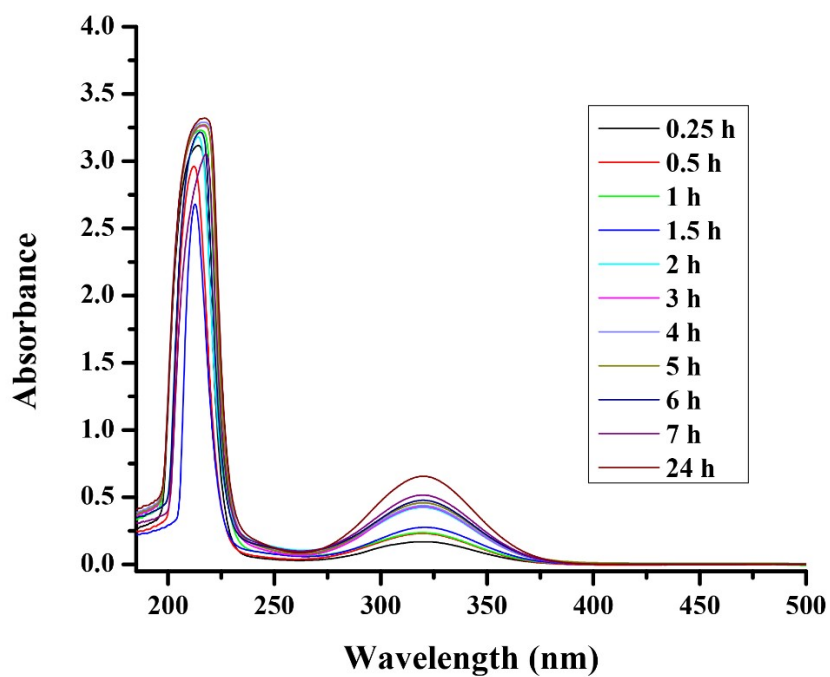

**Fig. S22** UV-Vis spectra of kinetic degradation of drug composite organo/hydrogel at pH 7.4

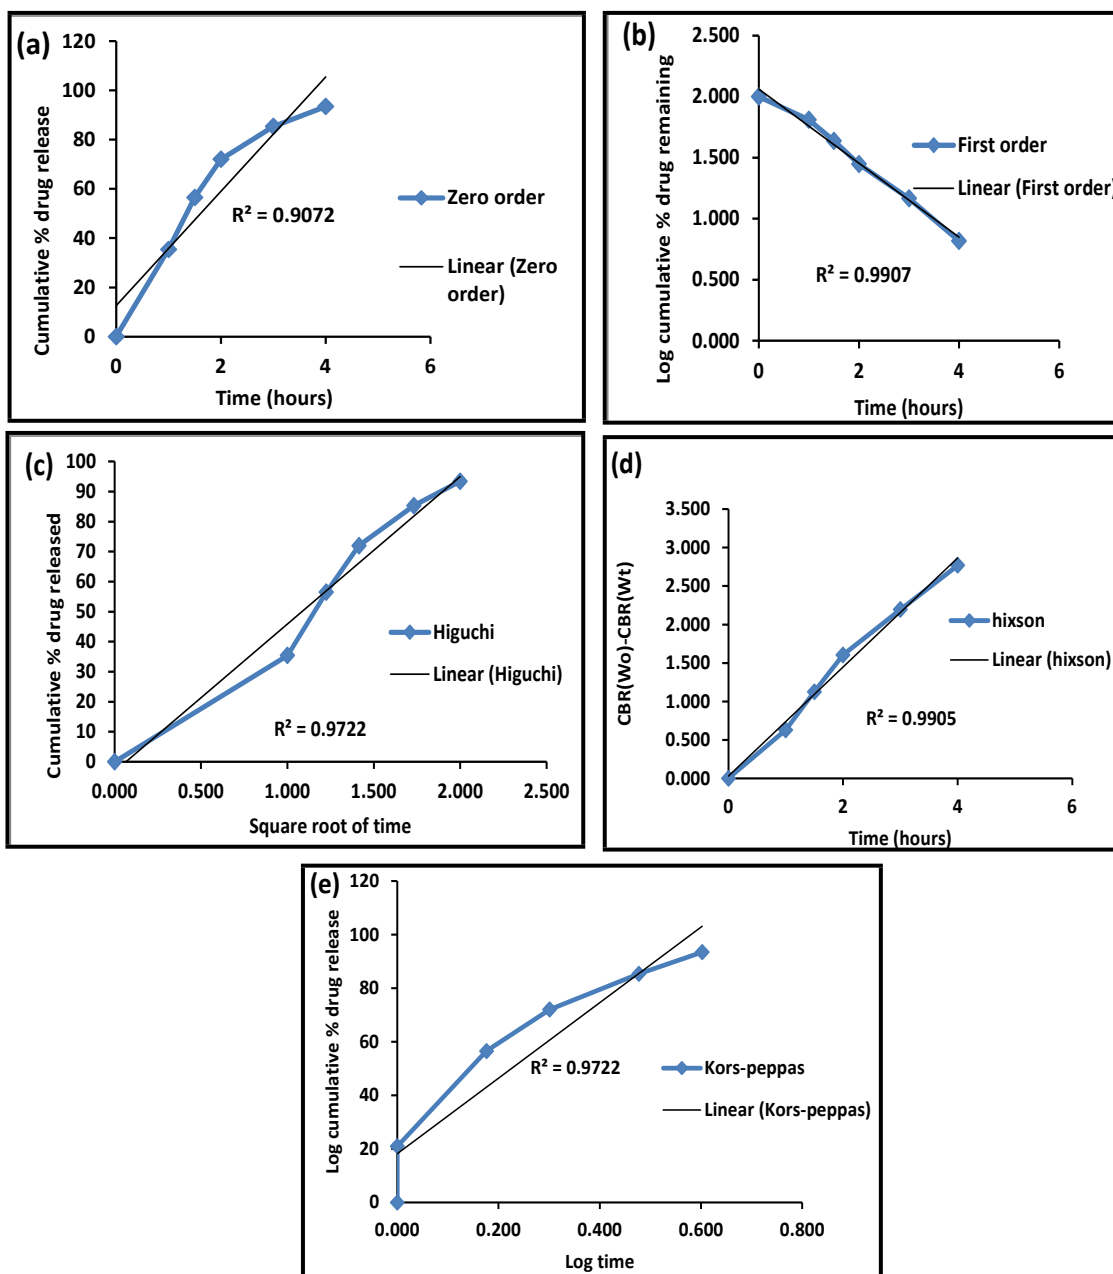

**Fig. S23** Drug release kinetics plots for drug loaded organo/hydrogels at pH 5.5 (a): zero-order; (b): first-order; (c): Higuchi; (d): Korsmeyer-Peppas; (e): Hixson-Crowell models

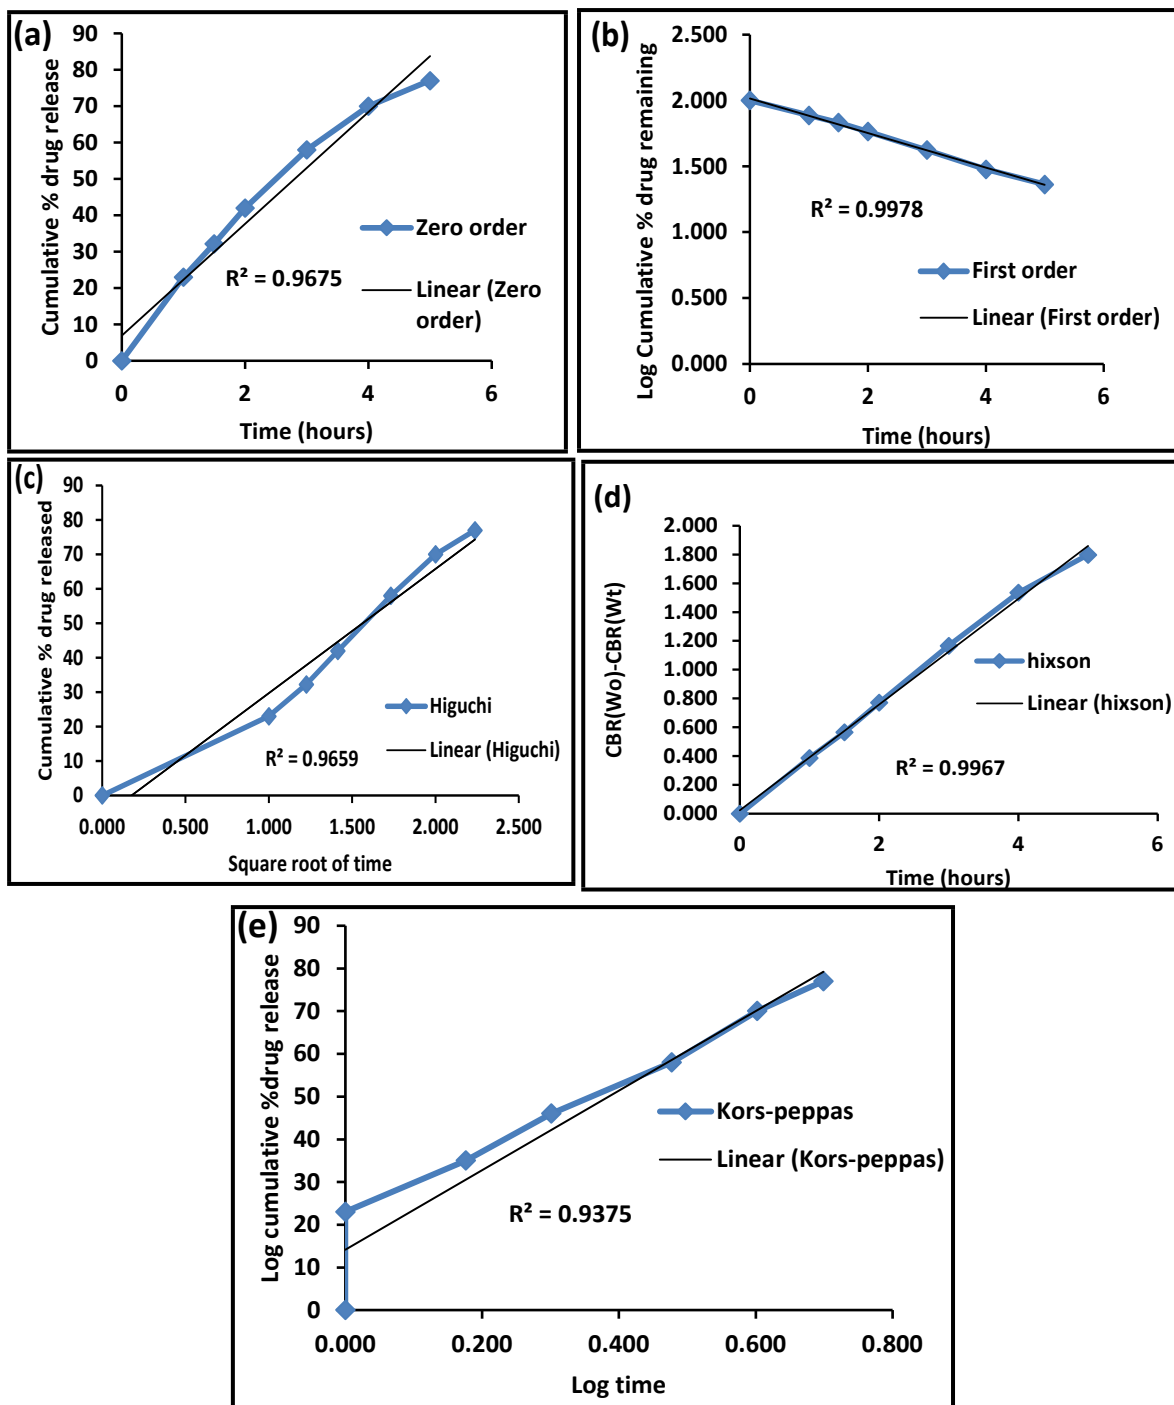

**Fig. S24** Drug release kinetics plots for drug loaded organo/hydrogels at pH 7.4 (a); zero-order (b); first-order (c); Higuchi (d); Korsmeyer-Peppas (e); Hixson-Crowell models

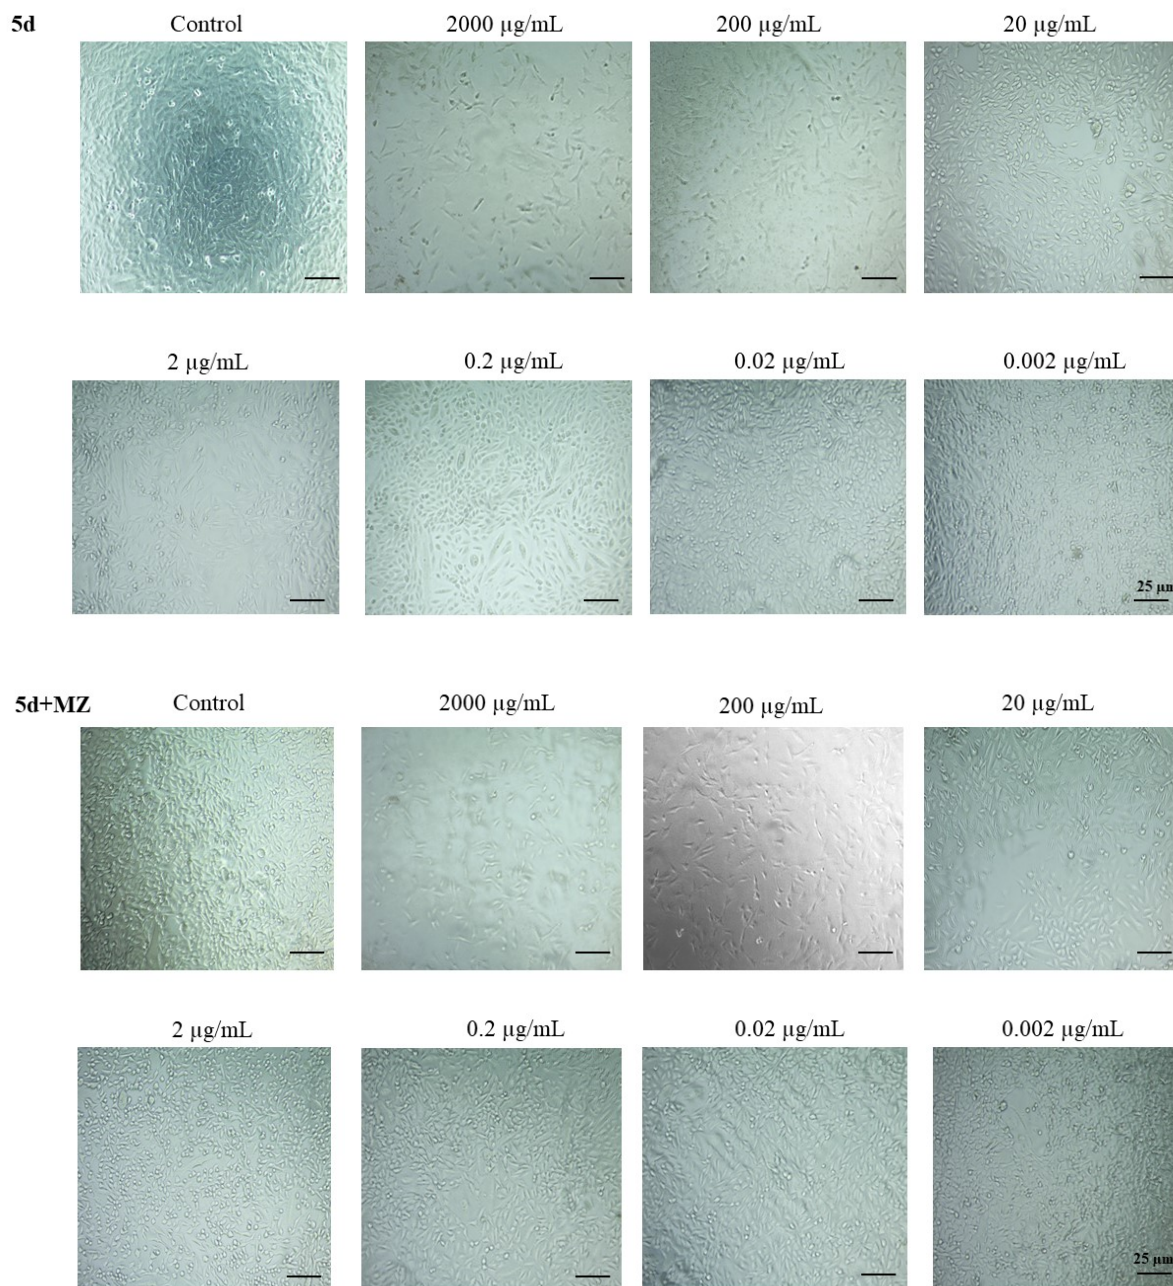

**Fig. S25** Cell viability images at different concentrations (2000  $\mu\text{g/mL}$ , 200  $\mu\text{g/mL}$ , 20  $\mu\text{g/mL}$ , 2  $\mu\text{g/mL}$ , 0.2  $\mu\text{g/mL}$ , 0.02  $\mu\text{g/mL}$ , 0.002  $\mu\text{g/mL}$ ) in comparison with the control (0.000  $\mu\text{g/mL}$ ) condition of **5d** and **5d+MZ**



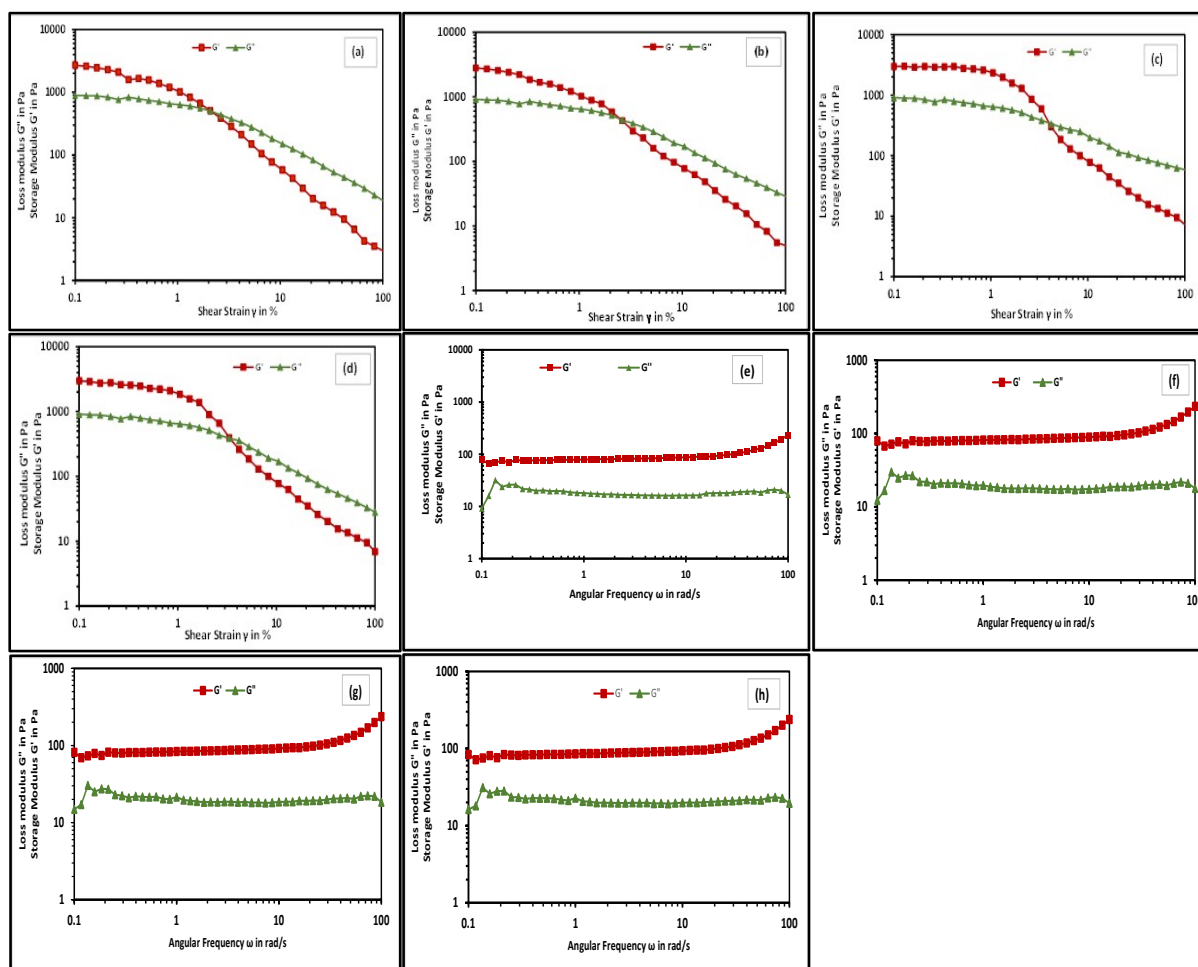

**Fig. S26** The strain amplitude rheological experiment for **5d** in DMSO/water at constant frequency 1 Hz; a) 15 mg; (b) 18 mg; (c) 21 mg; (d) 24 mg. The Frequency sweep rheological experiment for **5d** DMSO/water at constant strain of 1%; (e) 15 mg; (f) 18 mg; (g) 21 mg; (h) 24 mg
